# Supplementary material
Source: PubMed Central journal article supplement (PMC3126489)
Supplement: supp_85_13_6442__1.pdf [file supp_85_13_6442__1.pdf]

**A**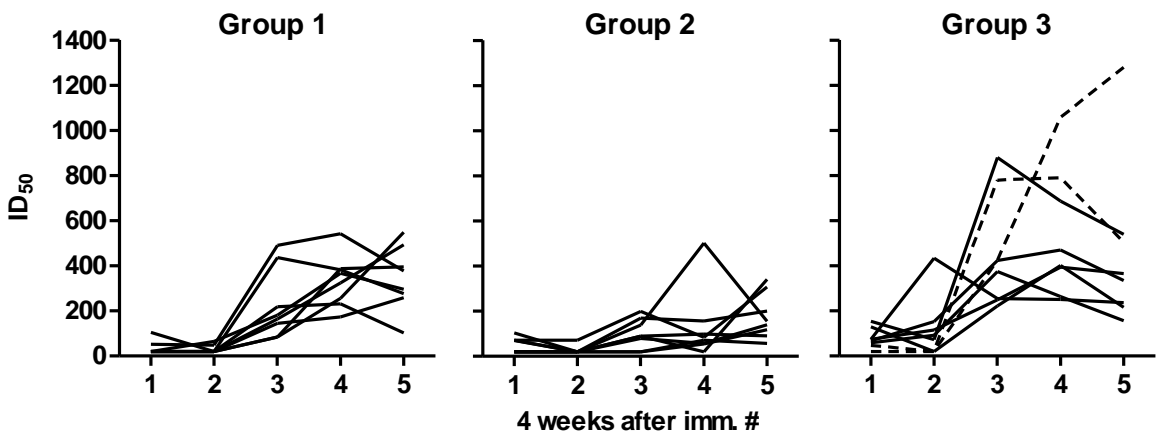**B**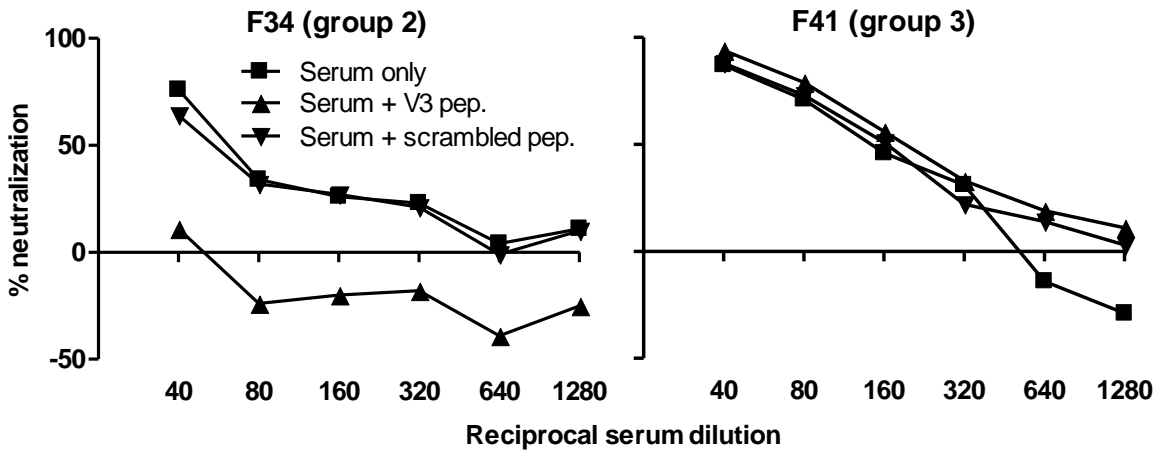

FIG. S1. Serum neutralization kinetics and inhibition of neutralization by V3 peptide. (A) Development of serum neutralizing activity in the presence of complement over the course of the immunization in groups 1, 2 and 3 macaques. Sera were obtained 4 weeks after each immunization. The protected animals (F42 and F44) are shown with broken lines. (B) Representative experiments of neutralization inhibition by HIV-1 BaL V3 peptide in groups 2 (F34) and 3 (F41).
