# Supplementary material
Source: PubMed Central journal article supplement (PMC3126489)
Supplement: supp_85_13_6442__2.pdf [file supp_85_13_6442__2.pdf]

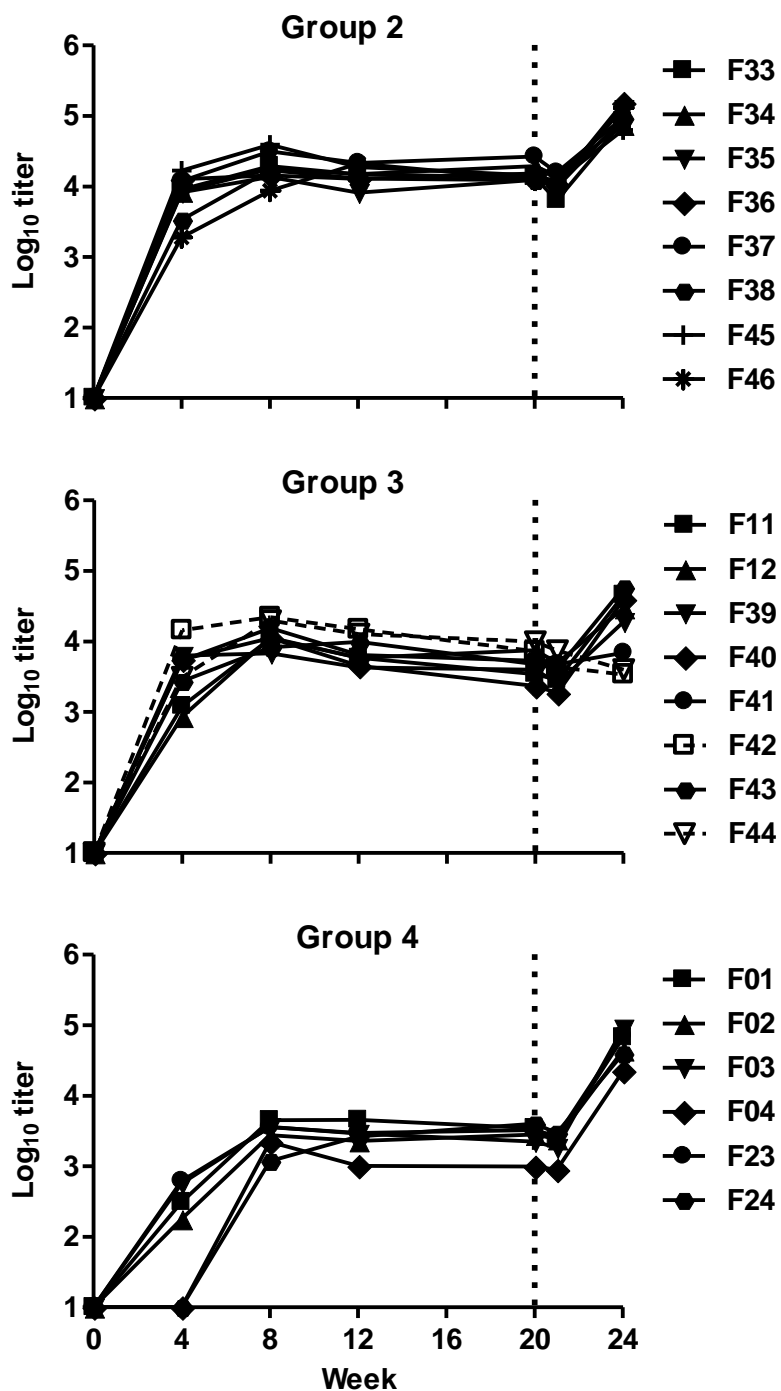

FIG. S2. Individual serum anti-gp120 IgG levels. End-point titers in group 2, 3 and 4 macaques over time. The dotted line indicates time of challenge. The protected animals (F42 and F44) are shown with open symbols and broken lines.
