# Supplementary material
Source: PubMed Central journal article supplement (PMC3126489)
Supplement: supp_85_13_6442__3.pdf [file supp_85_13_6442__3.pdf]

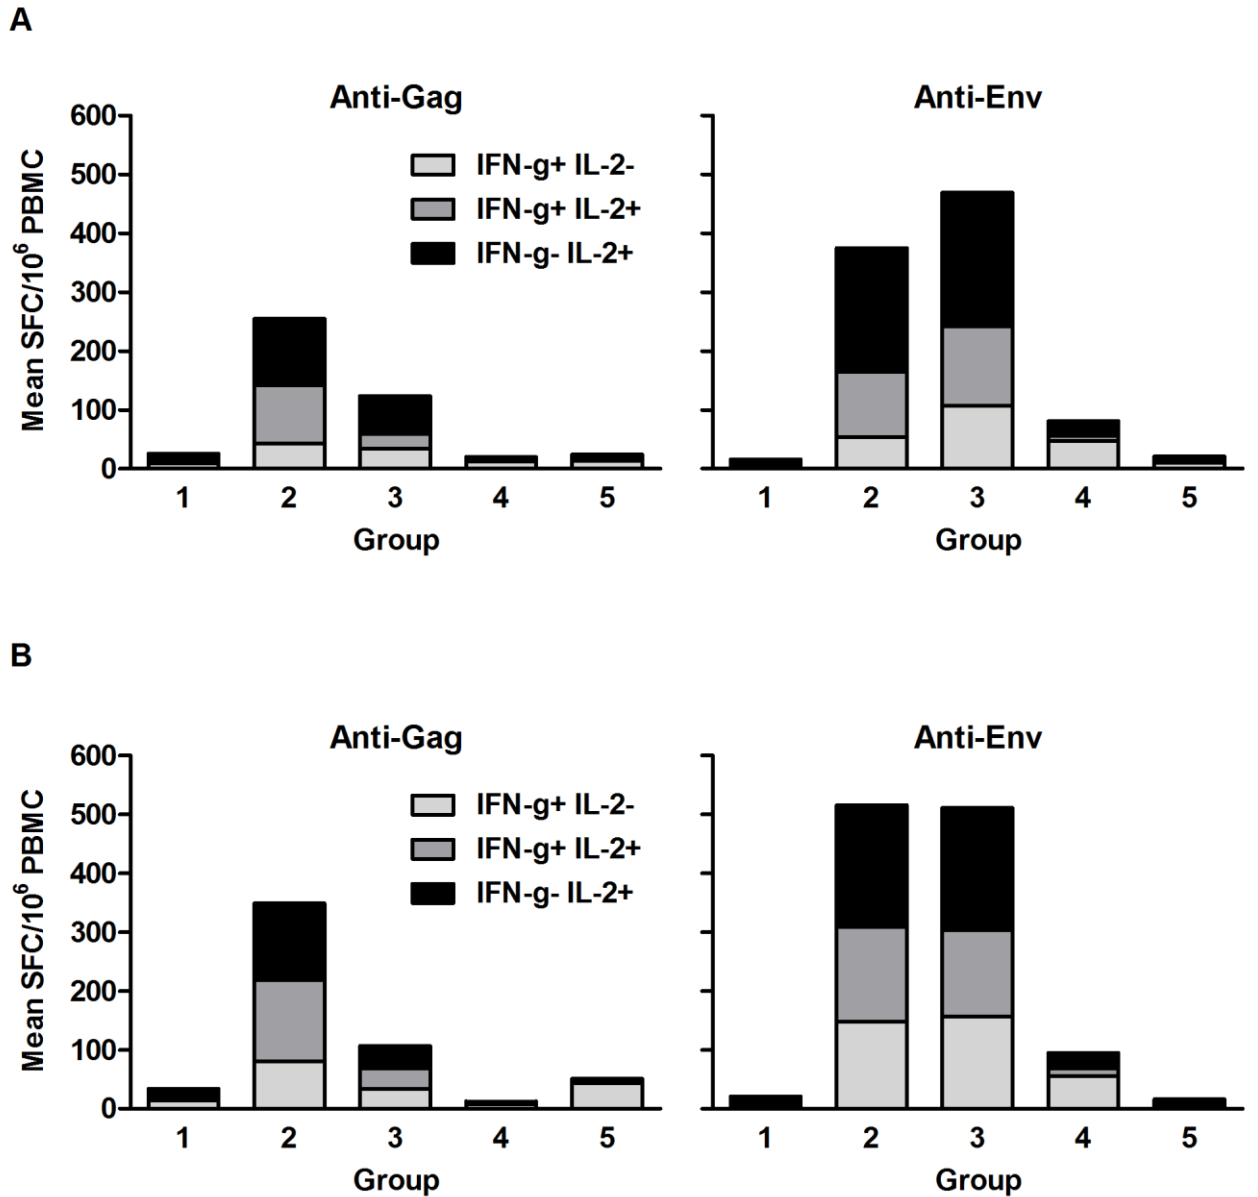

FIG. S3. IFN-g and IL-2 secretion by PBMC simultaneously measured by Fluorospot after stimulation with overlapping peptide pools representing HIV-1 YU2 gp140 and SIVmac239 Gag. PBMC collected (A) at the time of challenge and (B) one week after challenge.
