# Supplementary material
Source: PubMed Central journal article supplement (PMC3126489)
Supplement: supp_85_13_6442__4.pdf [file supp_85_13_6442__4.pdf]

A

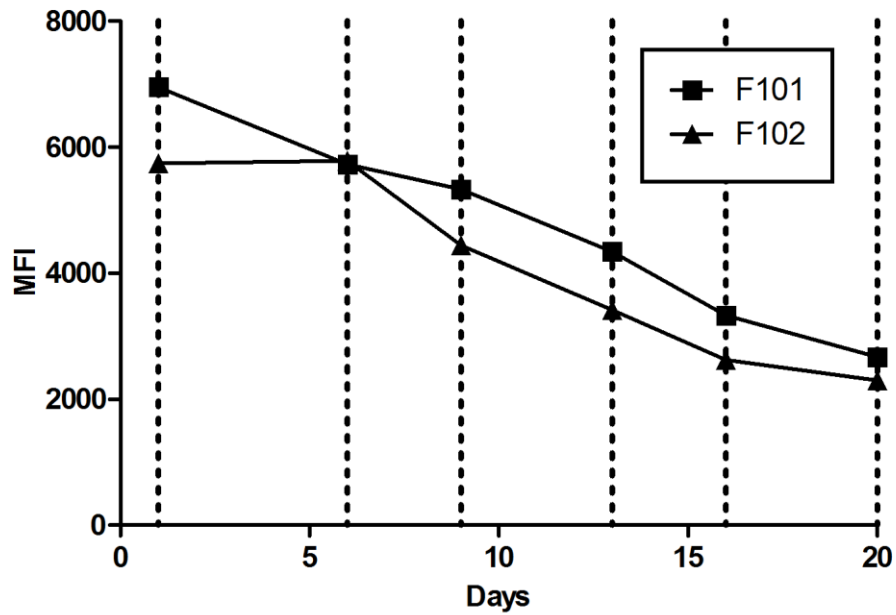

B

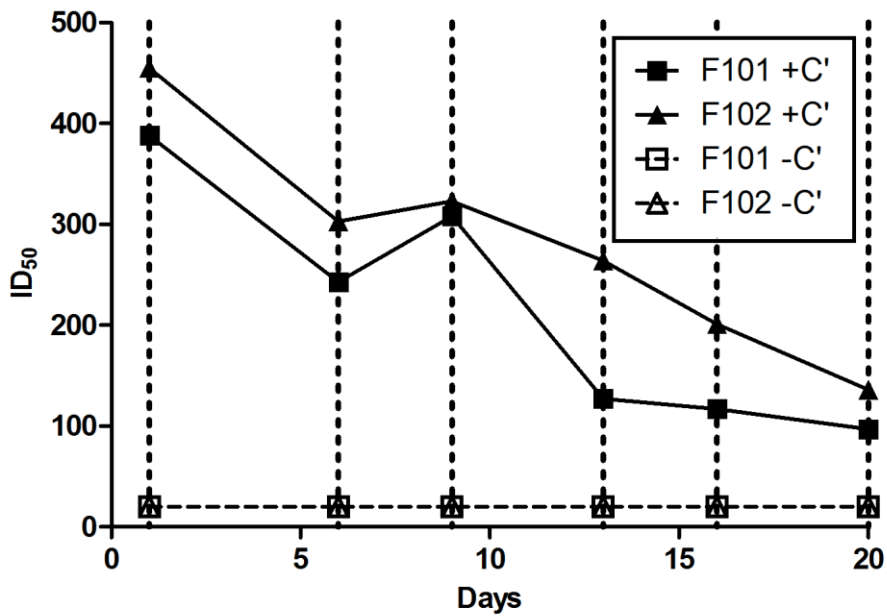

FIG. S4. Antigen specific serum antibody levels after transfer of immune serum to naive macaques F101 and F102. (A) Anti-C8166-CCR5 IgG at a 1/320 dilution (MFI). (B) Neutralization titers against SHIV-SF162P4/C (ID<sub>50</sub>) in the presence (+C') or absence (-C') of complement. Vertical dotted lines indicate i.v. SHIV-SF162P4/C challenges.
